# Supplementary material
Source: PubMed Central journal article supplement (PMC3939694)
Supplement: NIHMS536965-supplement-Supp_Figure_1.pdf [file NIHMS536965-supplement-Supp_Figure_1.pdf]

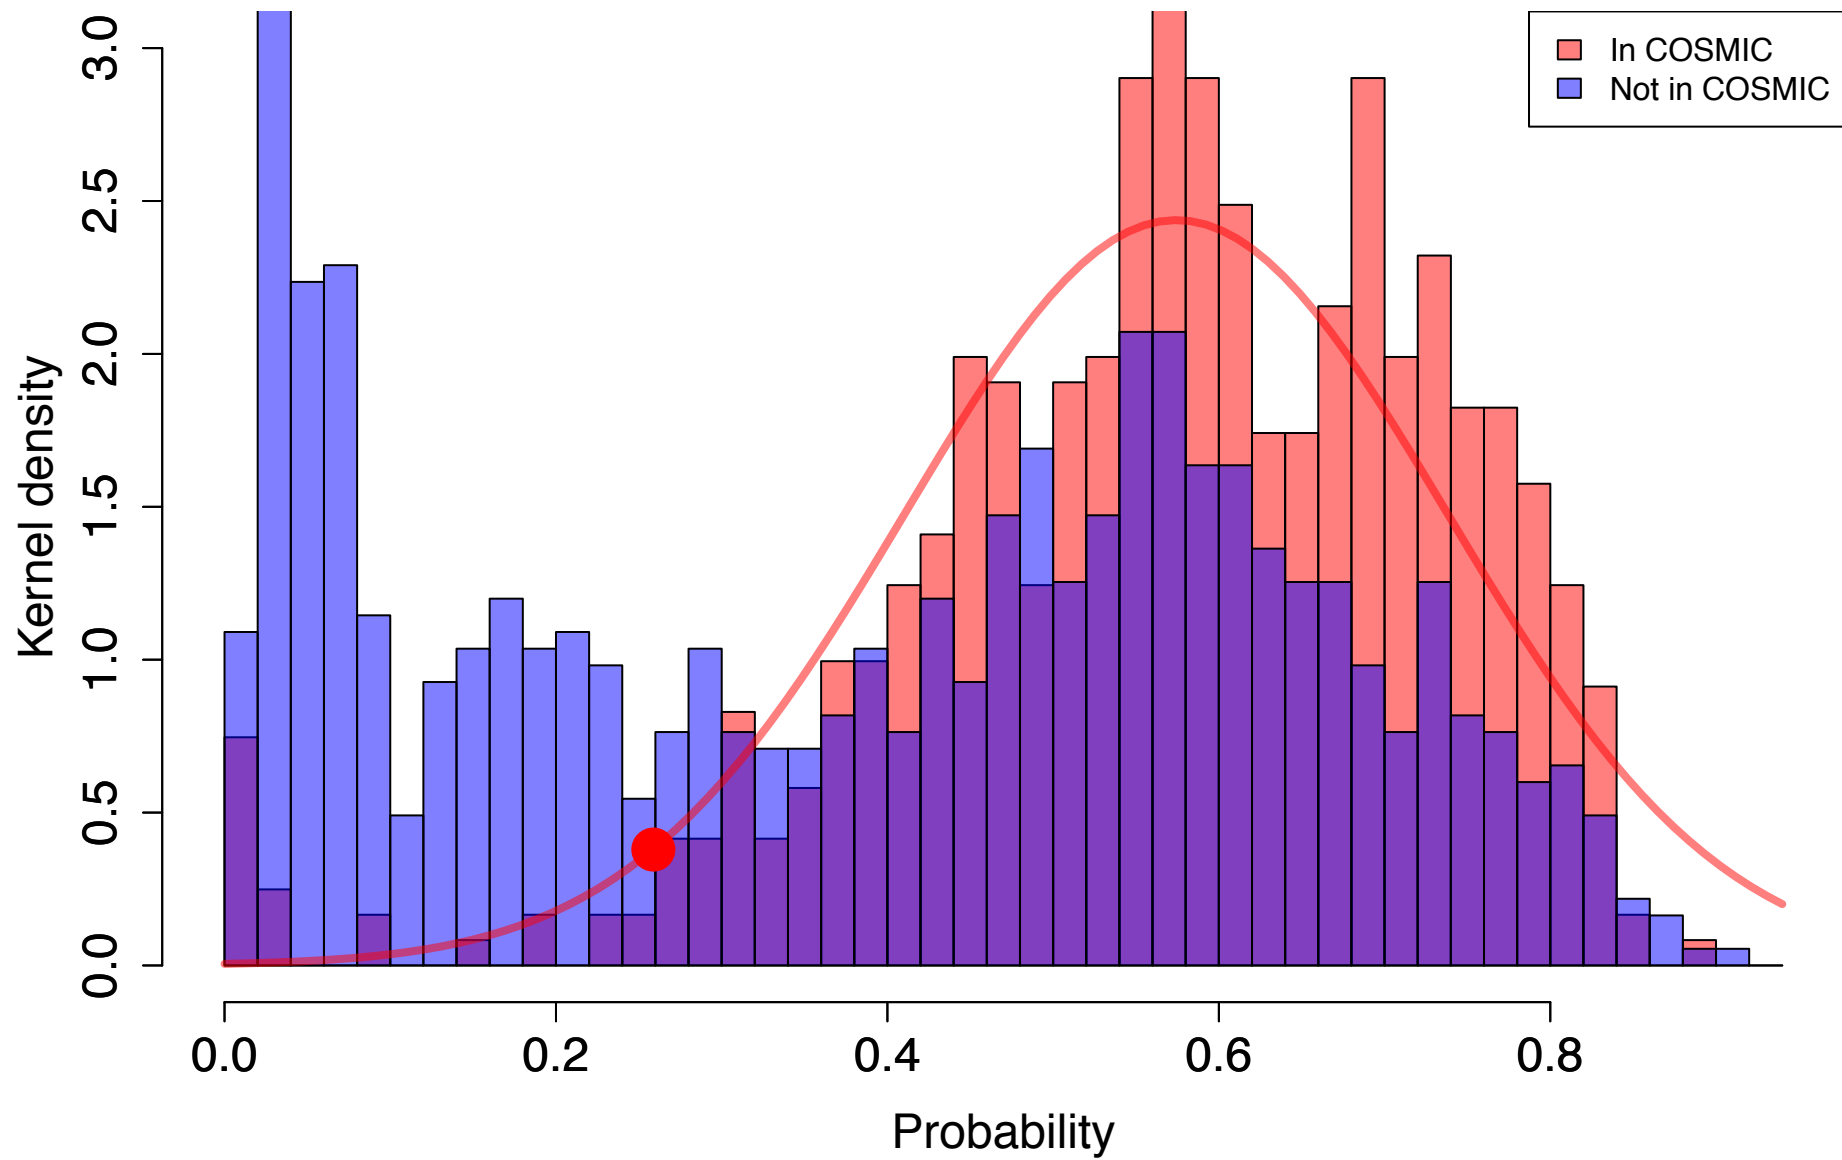

**Figure S1: A histogram of the probability distribution of the predicted SNV positions.**

SNVs found in COSMIC (red), have higher probabilities than those not in COSMIC (blue). The threshold cutoff for selecting positive SNVs was set at 0.2588 as indicated by the red circle. All mutations to the left of the red circle were considered false positives and not considered in the data set.
