# Supplementary material
Source: PubMed Central journal article supplement (PMC3939694)

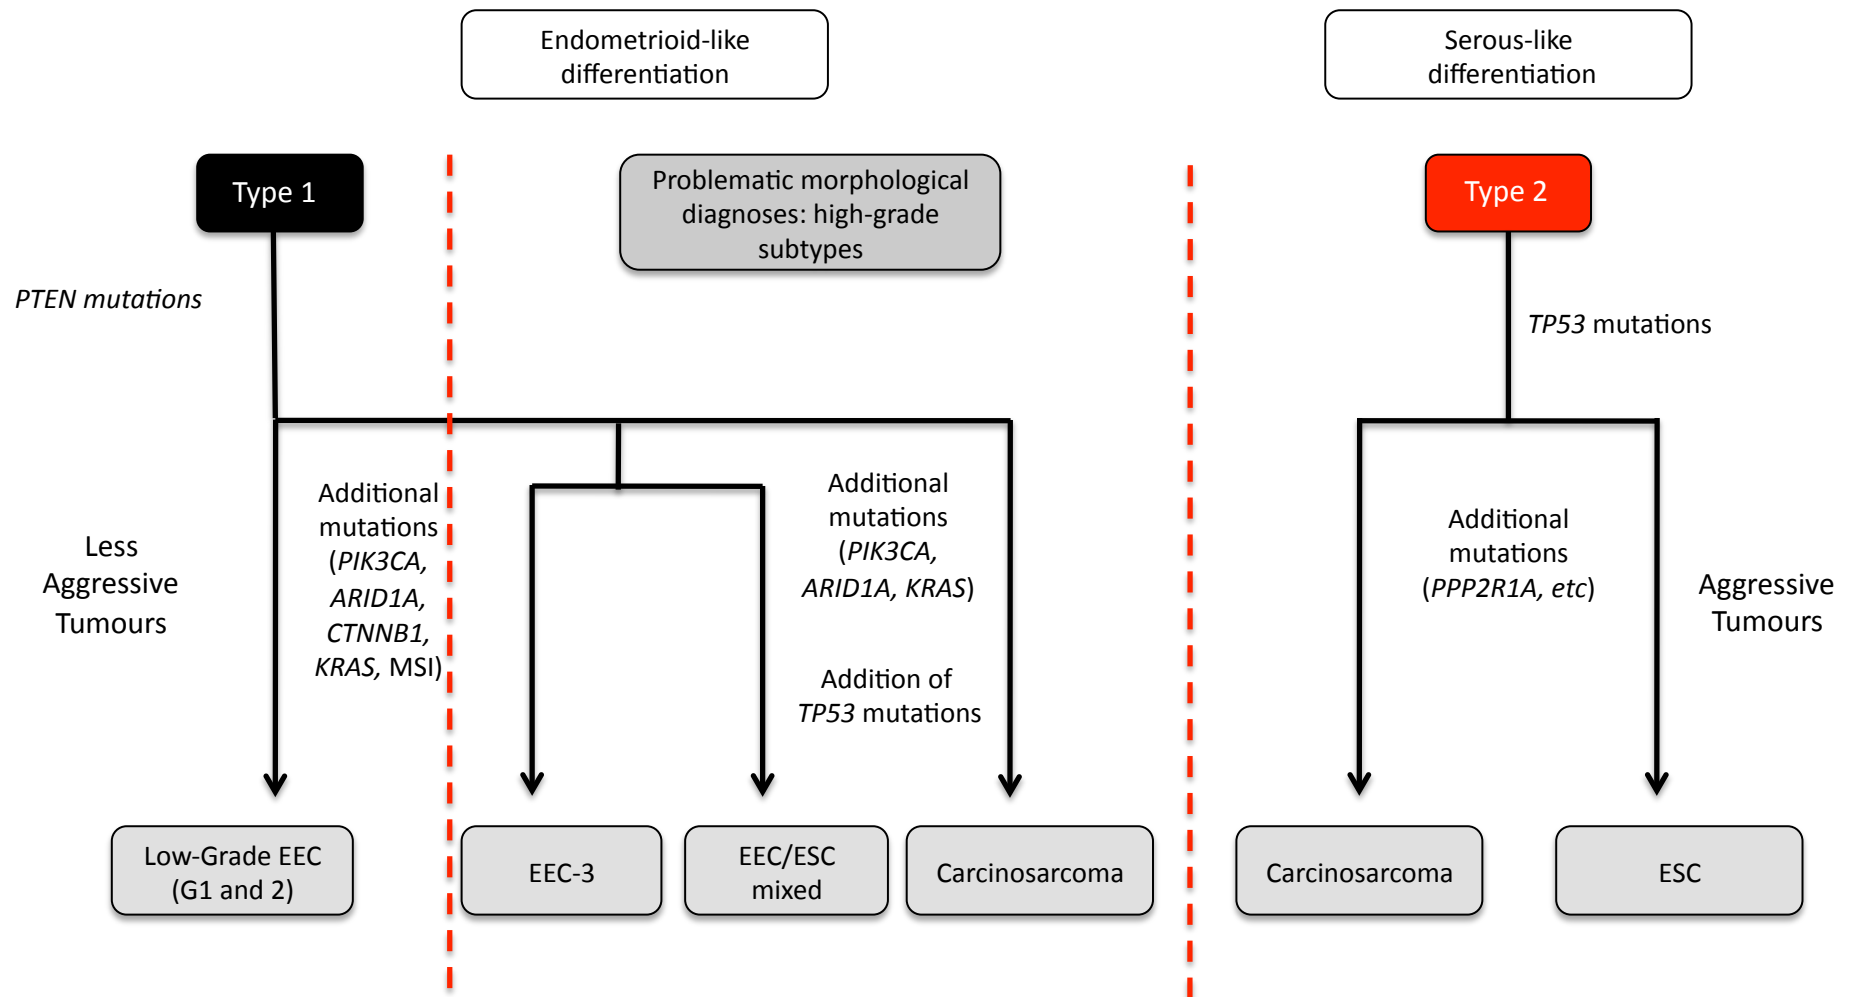

Figure S4

Supplement: NIHMS536965-supplement-Supp_Figure_4.pdf [file NIHMS536965-supplement-Supp_Figure_4.pdf]
